# Supplementary material for: Unanchored K63-linked polyubiquitin chains: a novel second messenger involved in G protein-coupled receptors early signaling events
Source: Research Square preprint supplement (doi:10.21203/rs.3.rs-5891152/v1), 2025-02-12
Supplement: Supplementary file 2 [file 534ad9fcff51a4419d95ffdf.pdf]

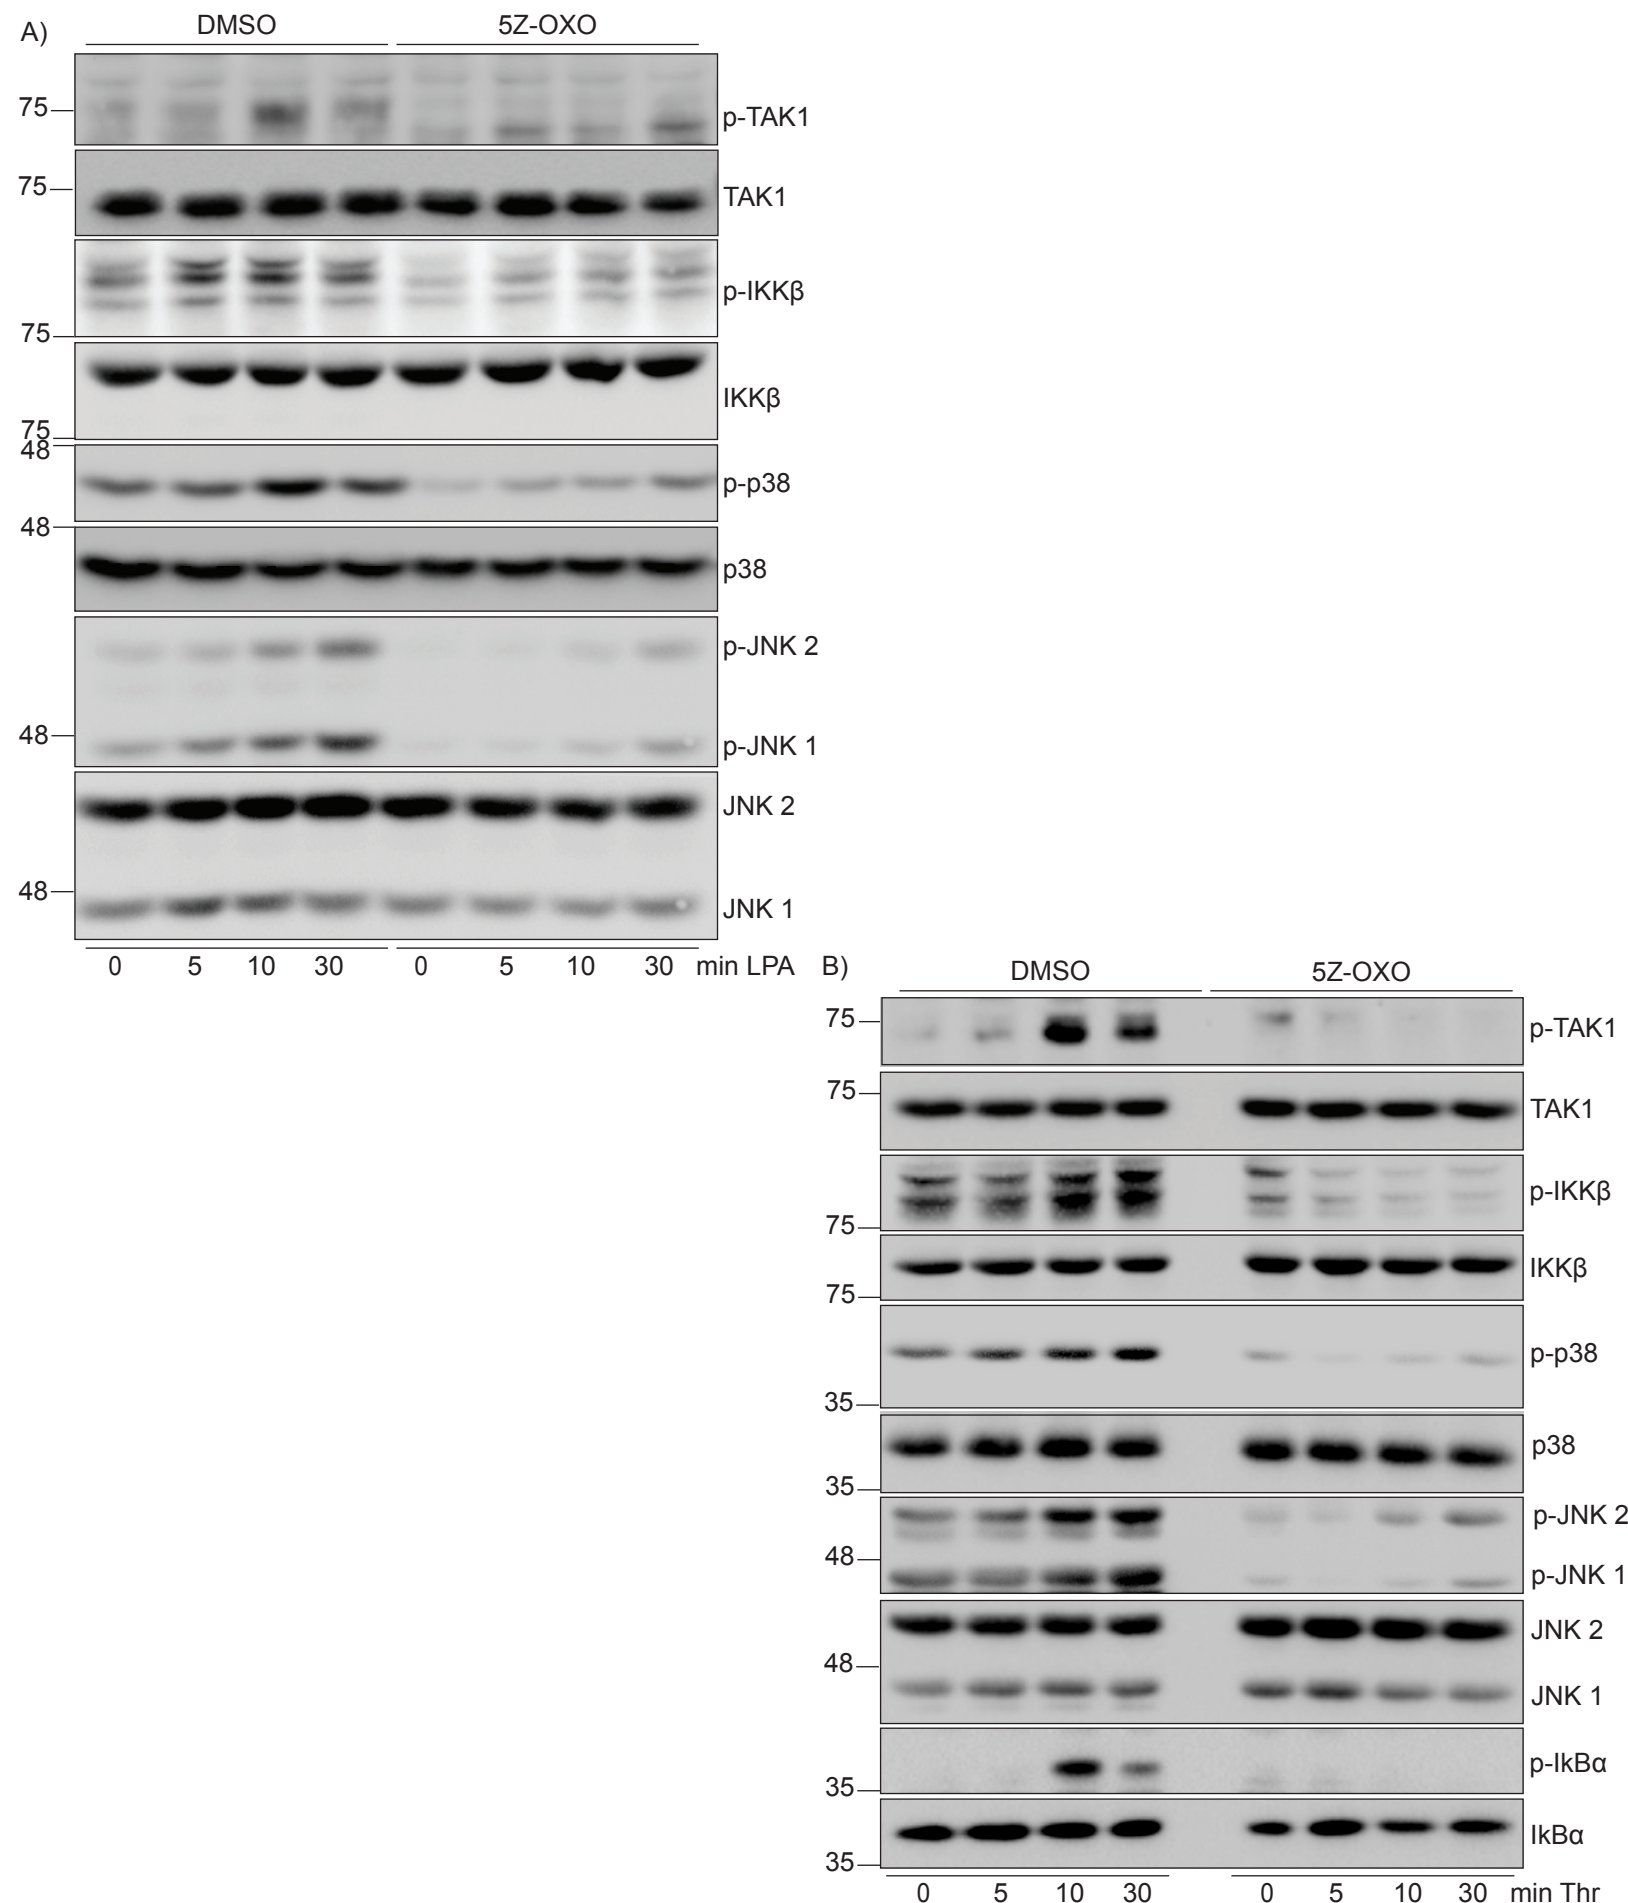

**Supplemental Figure 3. Requirement of TAK1 in LPA and Thr induced early signaling events .** A) Wild type TRAF6 MEFs were serum-starved for 4 hours and then pre-treated with 5Z-OXO (300 nM) for 1 hour prior to be exposed to LPA (10  $\mu$ M) for the indicated times. WCE were prepared and subjected to immunoblot-ting analysis using the indicated antibodies. Data are representative of 2 independent experiments. B ) Wild type TRAF6 MEFs were serum-starved for 4 hours and then pre-treated with 5Z-OXO (300 nM) for 1 hour prior to be exposed to THR (1U/ml) for the indicated times. WCE were prepared and subjected to immunoblot-ting analysis using the indicated antibodies. Data are representative of 3 independent experiments.
