# Supplementary material for: Unanchored K63-linked polyubiquitin chains: a novel second messenger involved in G protein-coupled receptors early signaling events
Source: Research Square preprint supplement (doi:10.21203/rs.3.rs-5891152/v1), 2025-02-12
Supplement: Supplementary file 3 [file 8a07bc5d08b4dec5e5f972b6.pdf]

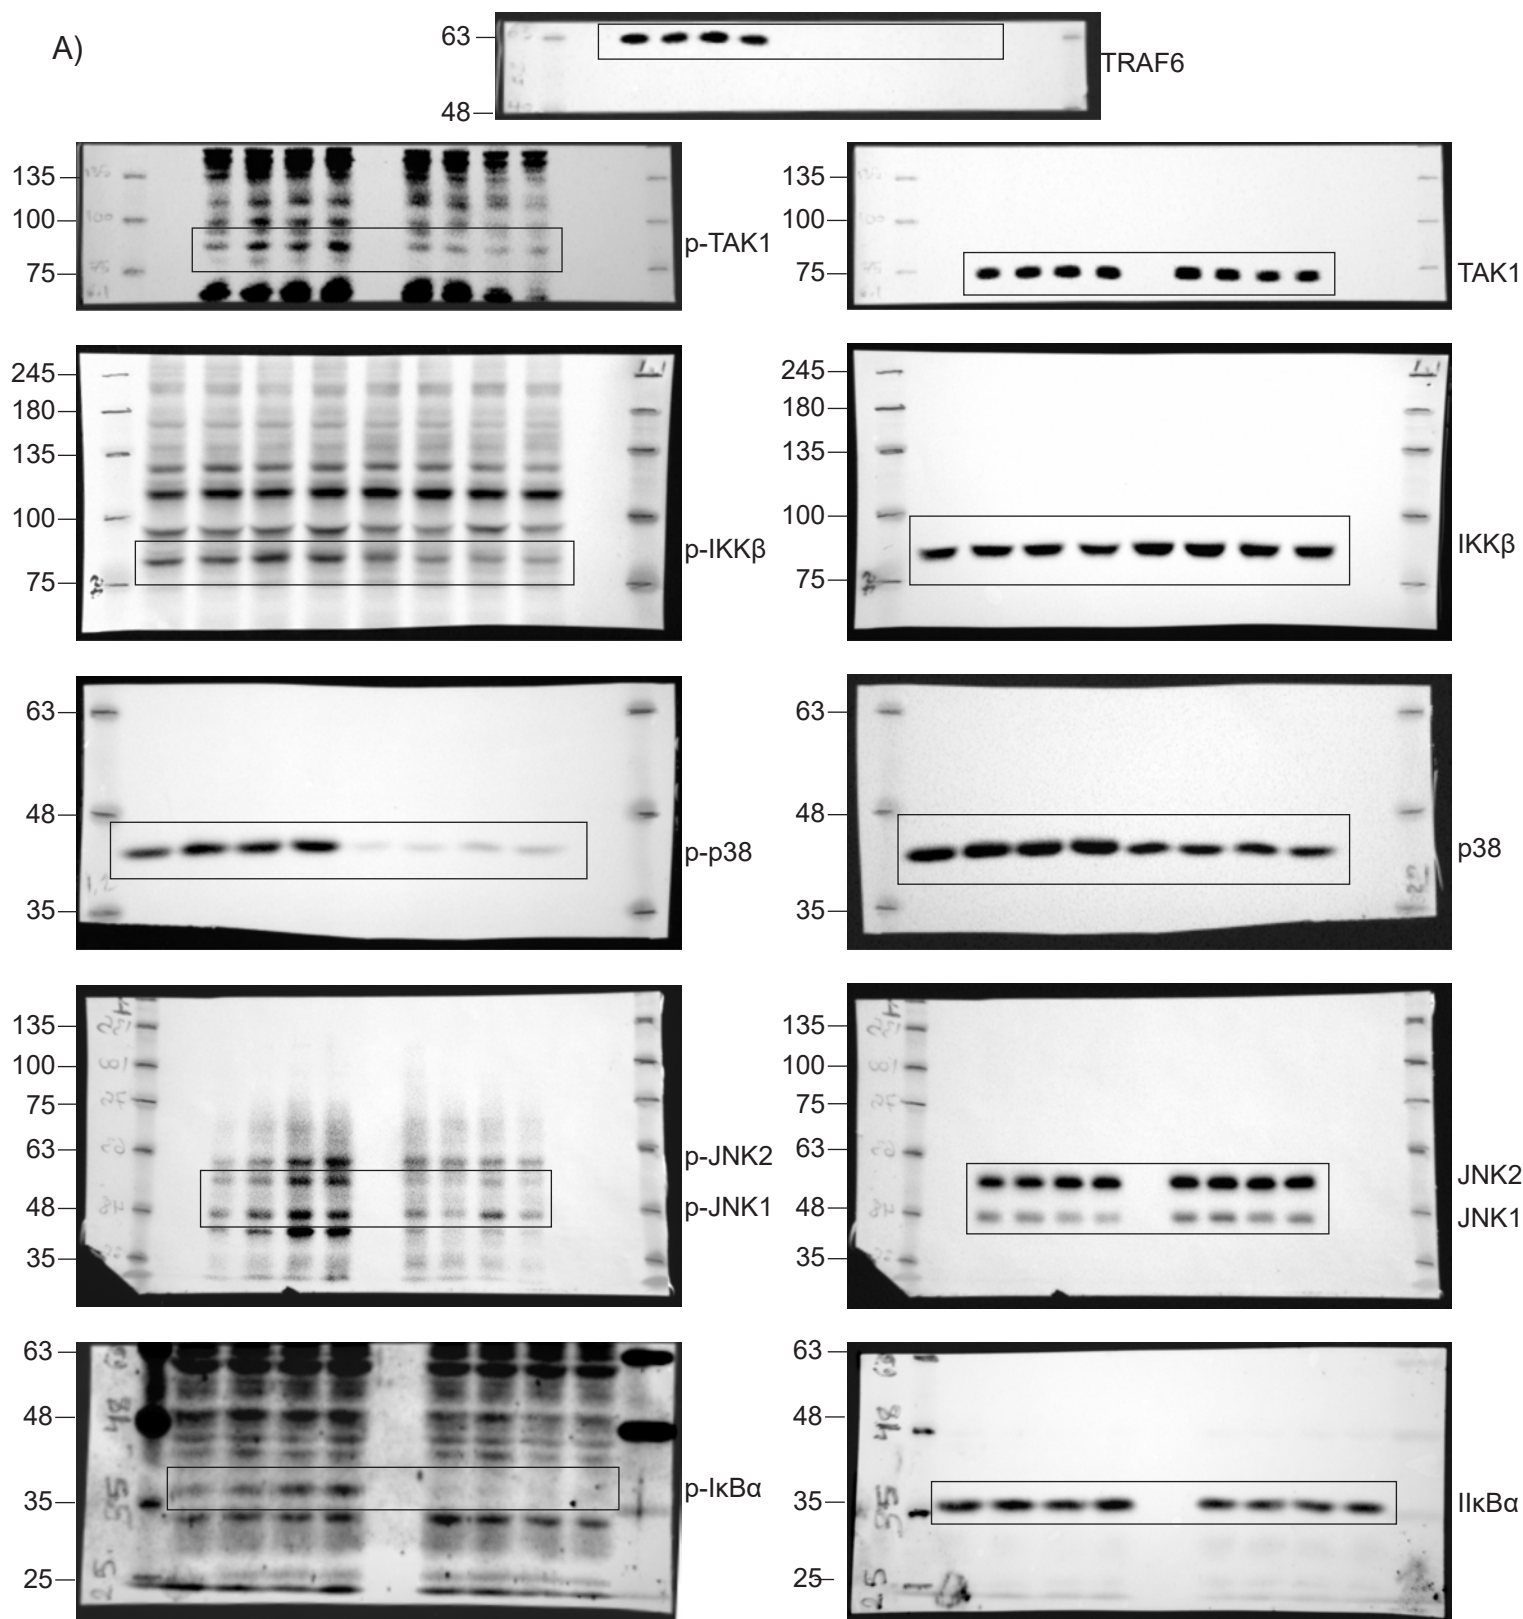

Supplemental Figure 5. Uncropped immunoblots. Figure 1

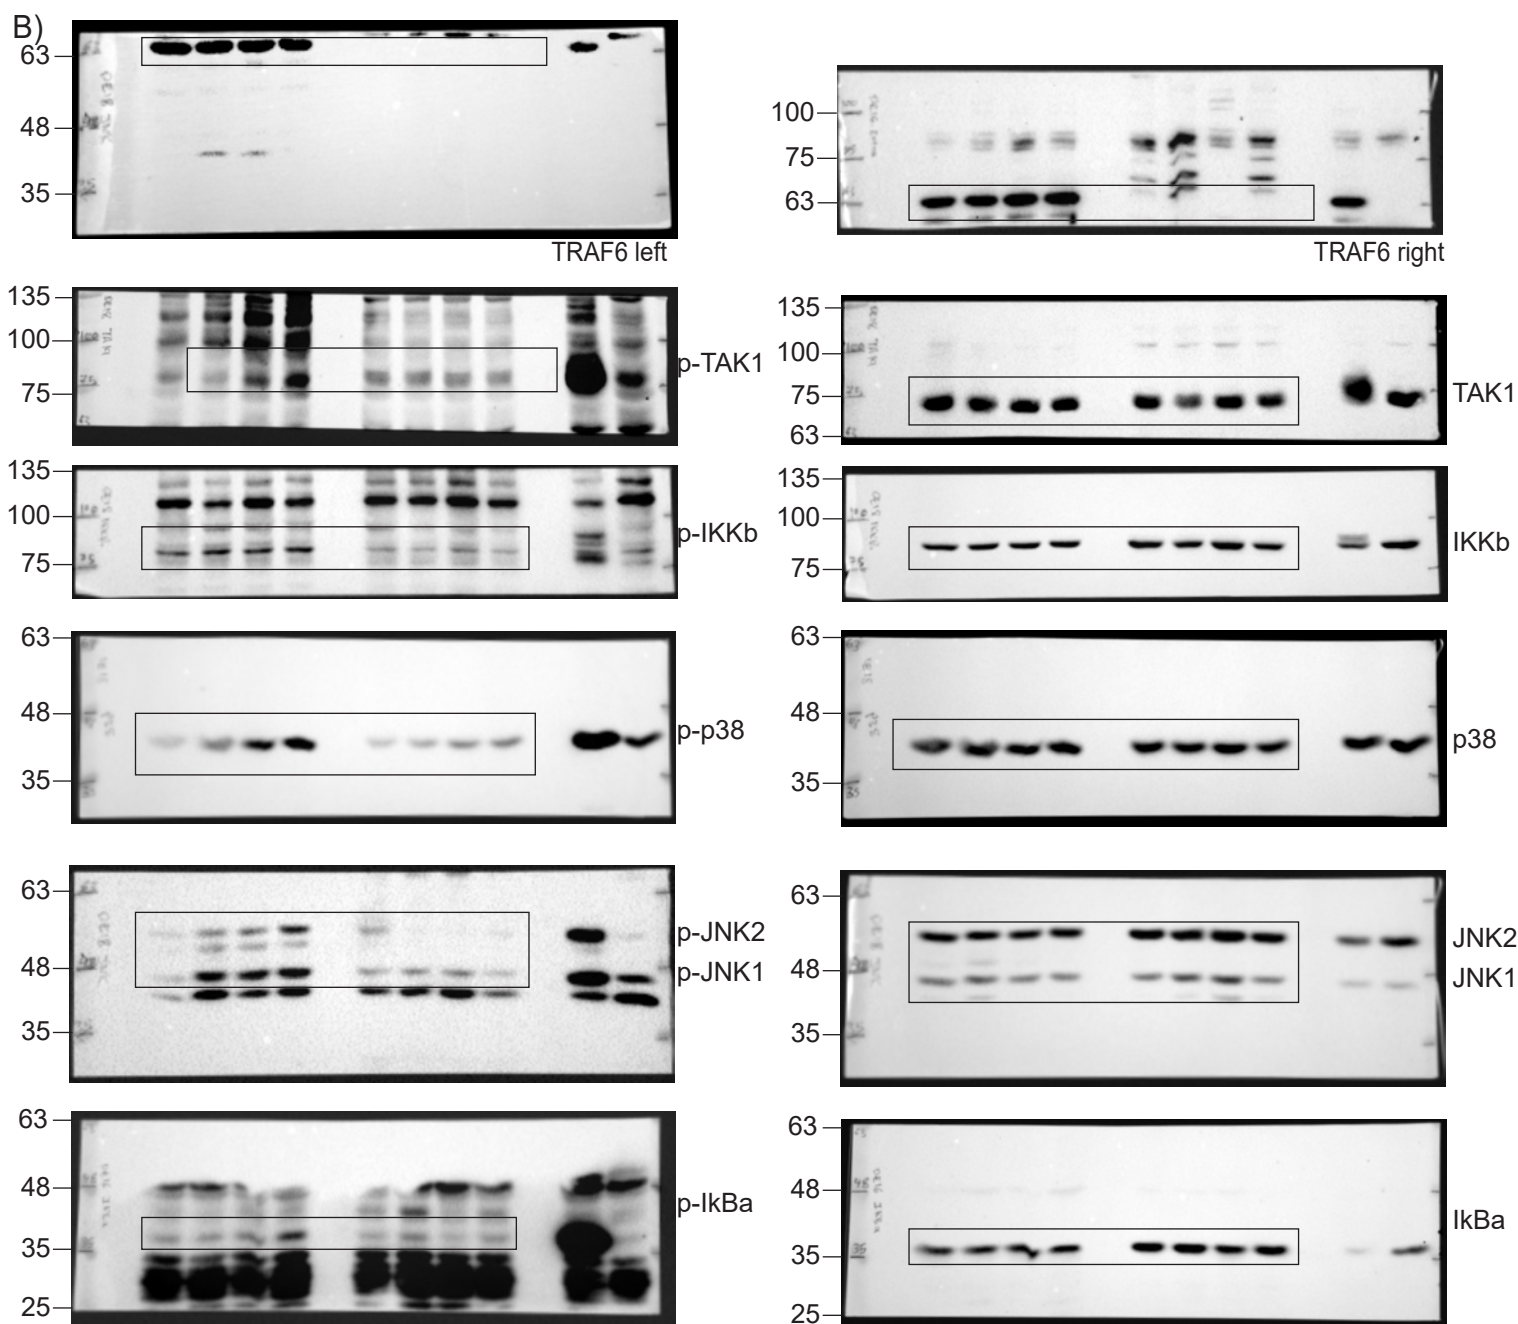

Supplemental Figure 5. Uncropped immunoblots. Figure 1
