# Supplementary material for: Unanchored K63-linked polyubiquitin chains: a novel second messenger involved in G protein-coupled receptors early signaling events
Source: Research Square preprint supplement (doi:10.21203/rs.3.rs-5891152/v1), 2025-02-12
Supplement: Supplementary file 4 [file 99f744c2ffdd723c4fedf9cb.pdf]

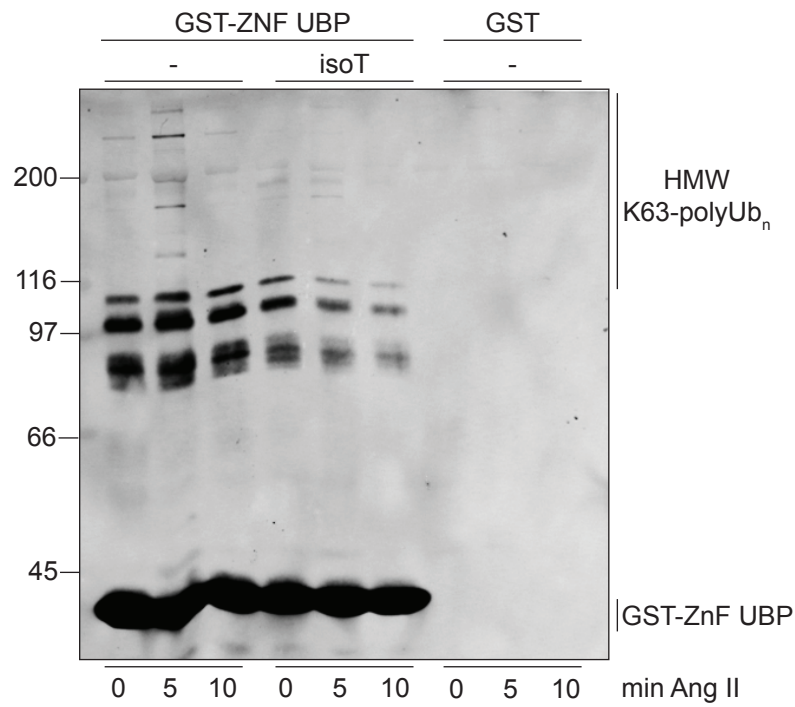

**Supplemental Figure 4. Rapid production of free K63-linked polyubiquitin chains in cells exposed to Ang II.** VSMC were serum-starved for 24 hours and then exposed to Ang II (100 nM) for the indicated times. WCE were prepared and subjected to GST or GST-ZnF UBP pull-down. GST-ZnF UBP-trapped proteins were treated with or without IsoT (200 nM) prior to immunoblotting analysis using both antibodies at the same time. Data are representative of a minimum of 3 independent experiments..
