# Supplementary material for: Unanchored K63-linked polyubiquitin chains: a novel second messenger involved in G protein-coupled receptors early signaling events
Source: Research Square preprint supplement (doi:10.21203/rs.3.rs-5891152/v1), 2025-02-12
Supplement: Supplementary file 5 [file af9f4d890281418356d5bfca.pdf]

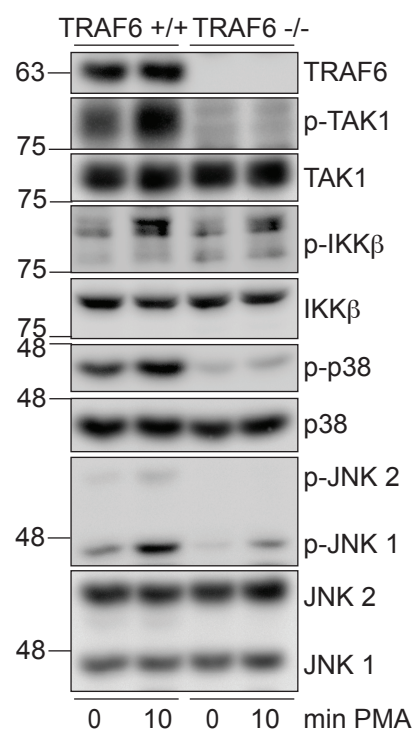

**Supplemental Figure 2. Requirement of TRAF6 in PMA induced early signaling events.** A) Wild type and TRAF6 knockout MEFs were serum-starved for 5 hours and then exposed to PMA (100 nM) for the indicated times. WCE were prepared and subjected to immunoblotting analysis using the indicated antibodies. Data are representative of 2 independent experiments.
