# Supplementary figures and images for: Unanchored K63-linked polyubiquitin chains: a novel second messenger involved in G protein-coupled receptors early signaling events
Source: Research Square preprint supplement (doi:10.21203/rs.3.rs-5891152/v1), 2025-02-12

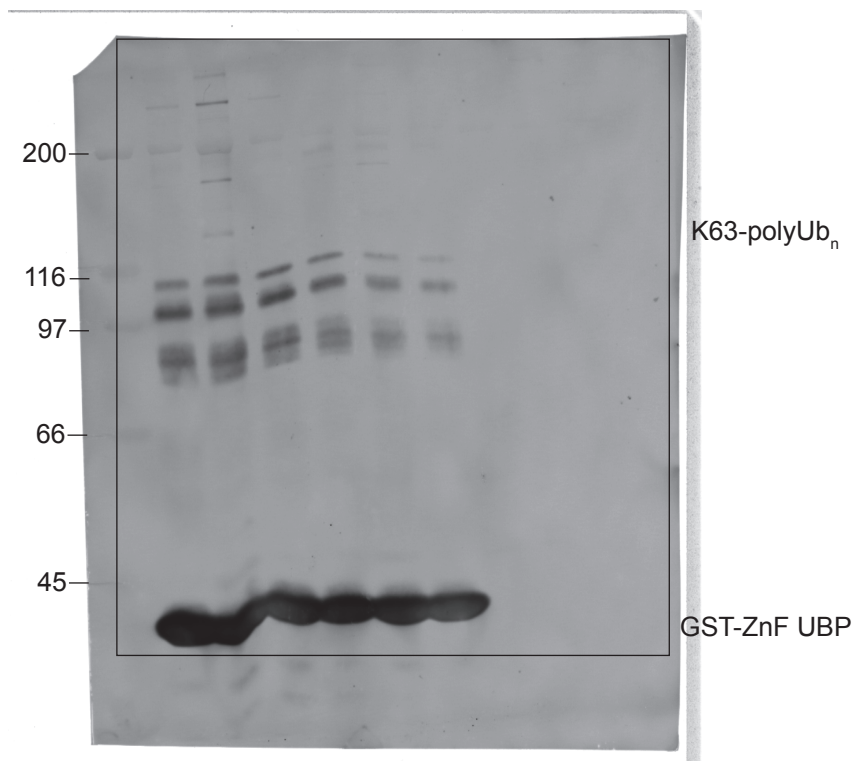

**Supplemental Figure 12. Uncropped immunoblots.** Supplemental Figure 4.

Supplement: Supplementary file 1 [file 43d7631f28eaa82e615eadc4.pdf]

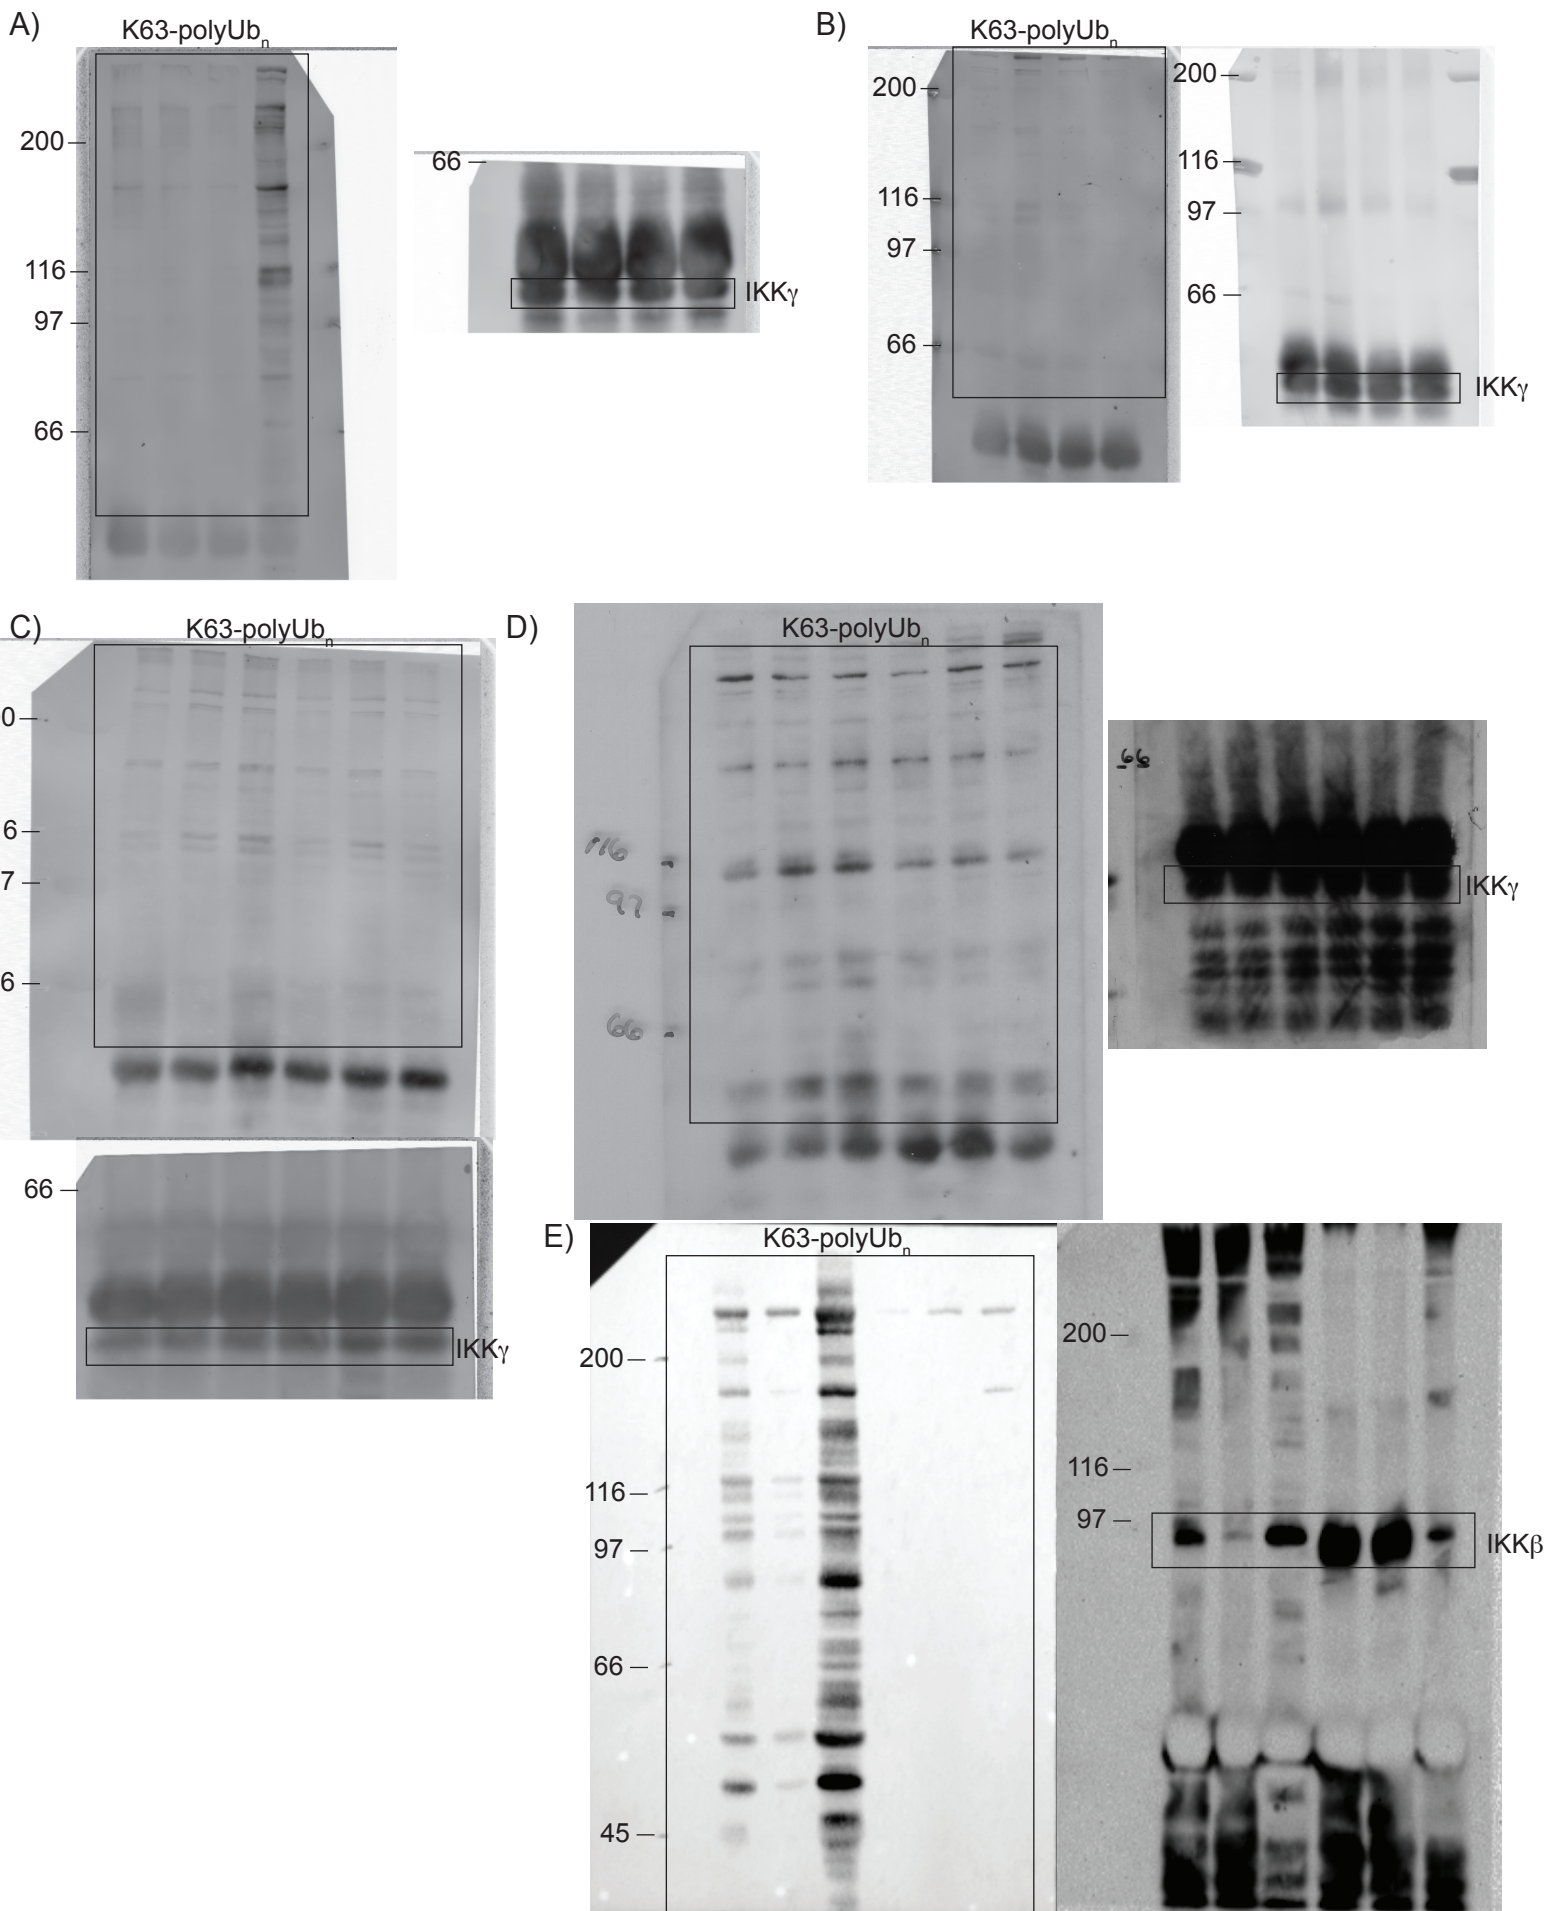

Supplemental Figure 7. Uncropped immunoblots. Figure 3

Supplement: Supplementary file 6 [file b560ef05188e262b323c1f45.pdf]

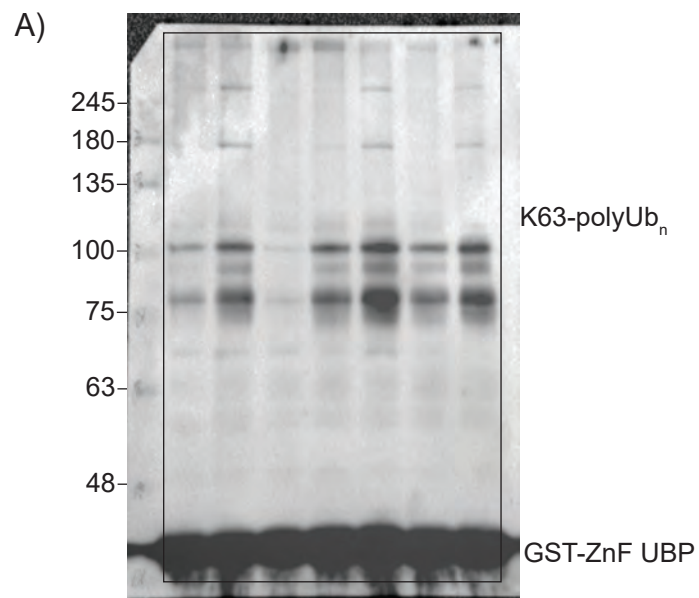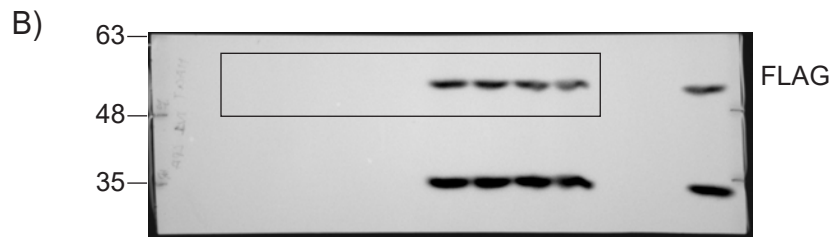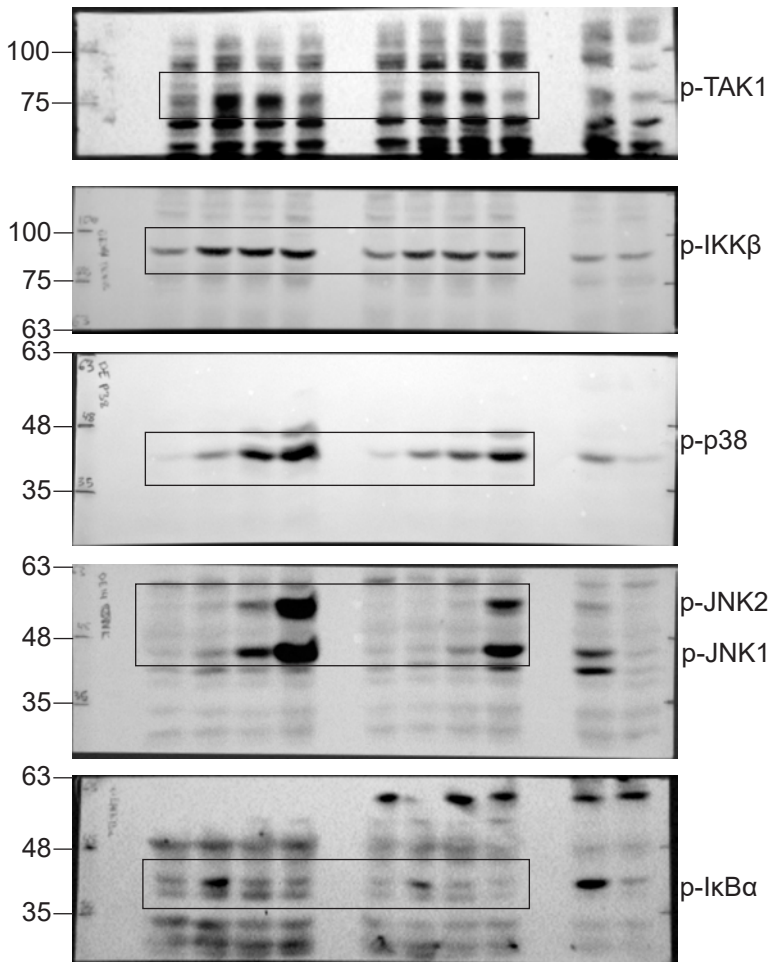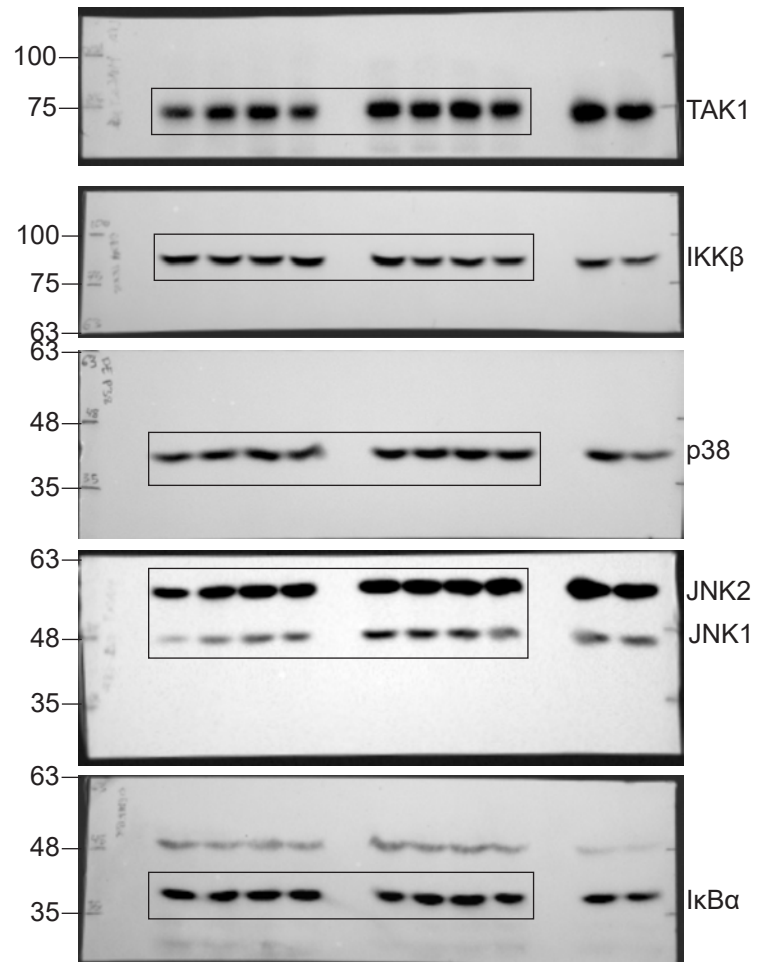

Supplemental Figure 8. Uncropped immunoblots. Figure 4

Supplement: Supplementary file 7 [file ef4b5907d9d5890d8835e5b4.pdf]
